# Supplementary material for: Measurement Invariance Analysis of the Parental Stress Index
Source: Atypon-hosted journal article supplement (doi:10.1027/1015-5759/a000463), 2018-03-29
Supplement: 1015-5759_a000463_esm2.pdf [file 1015-5759_a000463_esm2.pdf]

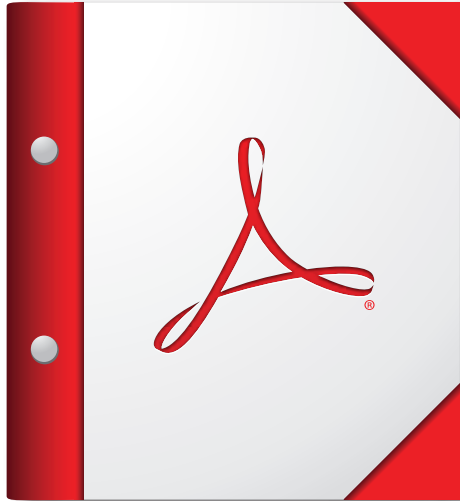

**Zur optimalen Anzeige dieses PDF-Portfolios sollte es in Acrobat oder Adobe Reader ab Version X geöffnet werden.**

[Adobe Reader jetzt herunterladen](#)
